# Supplementary material for: No Adverse Programming by Post‐Weaning Dietary Fructose of Body Weight, Adiposity, Glucose Tolerance, or Metabolic Flexibility
Source: PubMed Central journal article supplement — Mol Nutr Food Res. 2017 Dec 11;62(2):1700315. doi: 10.1002/mnfr.201700315 (PMC5814917; doi:10.1002/mnfr.201700315), 2017-12-11
Supplement: MNFR-62-na-s001.pdf [file MNFR-62-na-s001.pdf]

## Supporting information

**Figure S2.** Representative overview pictures of pancreatic DAB-insulin staining.

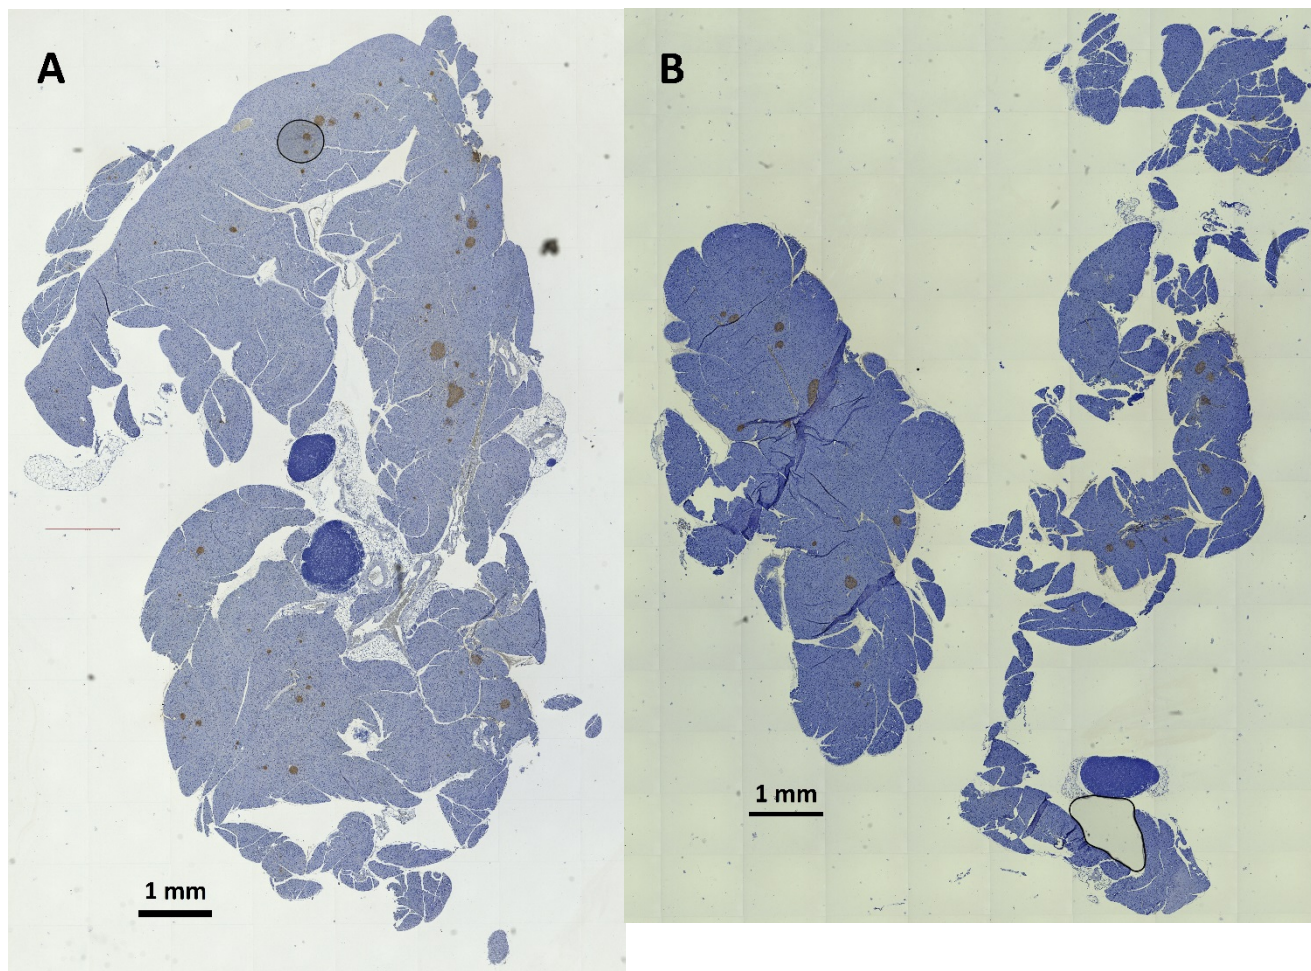

**Figure S2.** Representative overview pictures of DAB staining for insulin counterstained with hematoxylin in pancreas of (A) a GLU-HFD female and (B) a FRU-HFD female, used to estimate beta cell islet area. Brown staining indicates DAB colouring. Photographs were taken at the same magnification, and merged into overview pictures with LasX pc software (Leica Microsystems, Wetzlar, Germany).
